# Supplementary material
Source: Springer Nature journal article supplement (https://www.springermedizin.de/resource/supplementary/13054_2011_9596_MOESM4_ESM.pdf/9706560)

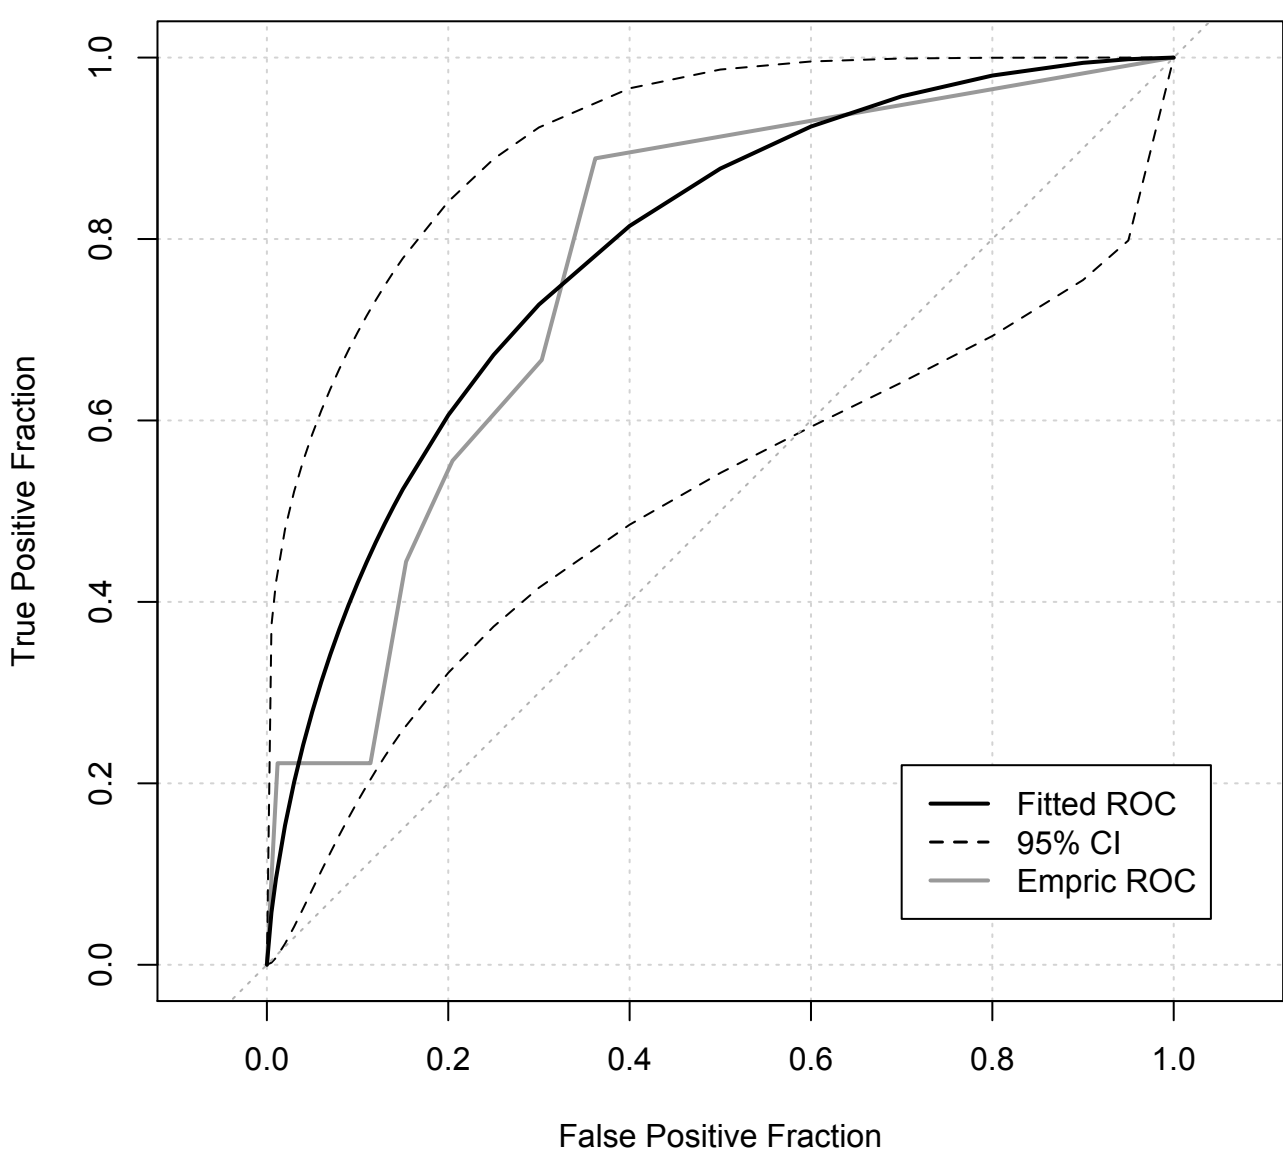

Supplement: MOESM4 [file 9706560]
